# Supplementary material for: The Monetite Structure Probed by Advanced Solid-State NMR Experimentation at Fast Magic-Angle Spinning
Source: Int J Mol Sci. 2019 Dec 17;20(24):6356. doi: 10.3390/ijms20246356 (PMC6940740; doi:10.3390/ijms20246356)
Supplement: Supplementary file 1 [file ijms-20-06356-s001.pdf]

# Supporting Information for

## The Monetite Structure Probed by Advanced Solid-State NMR Experimentation at Fast Magic-Angle Spinning

Yang Yu<sup>1</sup>, Baltzar Stevansson<sup>1</sup>, Michael Pujari-Palmer<sup>2</sup>, Hua Guo<sup>1</sup>,  
Håkan Engqvist<sup>2</sup>, and Mattias Edén<sup>1,\*</sup>

<sup>1</sup>Department of Materials and Environmental Chemistry, Stockholm University,  
SE-106 91 Stockholm, Sweden

<sup>2</sup>Applied Material Science, Department of Engineering, Uppsala University,  
SE-751 21 Uppsala, Sweden

\*Corresponding author. E-mail: [mattias.eden@mmk.su.se](mailto:mattias.eden@mmk.su.se)

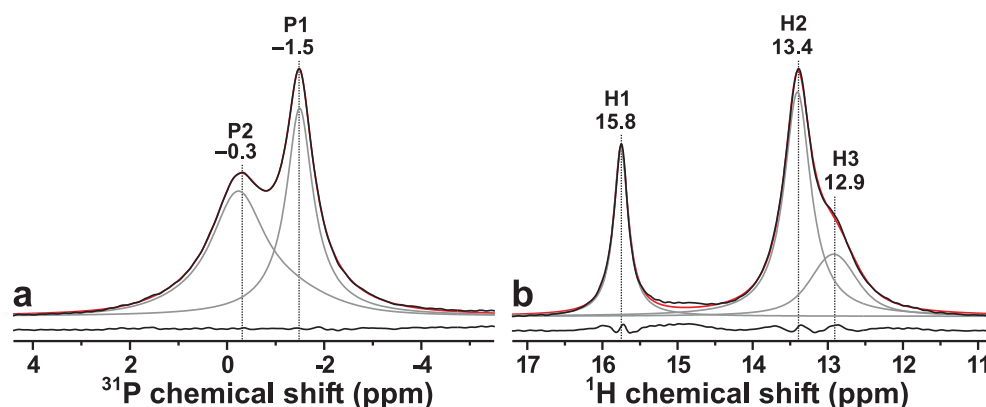

**Figure S1.** Deconvoluted (a) <sup>31</sup>P and (b) <sup>1</sup>H MAS NMR spectra (obtained at  $\nu_r = 66$  kHz for <sup>1</sup>H). The experimental NMR spectra (black traces) are shown together with the best-fit result (red traces), as well as the component NMR peaks (grey traces). The curve beneath each NMR spectrum represents the difference between the experiment and best-fit. Note that each <sup>31</sup>P resonance (grey traces) from the respective P1 and P2 sites in (a) represents the sum of two signals: one narrow (fitted with the constraint FWHM < 1.5 ppm) and one broad (FWHM < 4.2 ppm) NMR peak, which were necessary to emulate the structural disorder of the monetite structure. We refer to refs. [S1] and [S2] for details about the deconvolution procedure. Each of the three <sup>1</sup>H NMR resonances from the <sup>1</sup>H1, <sup>1</sup>H2, and <sup>1</sup>H3 sites in (b) were accounted for by one peak.

## References

- [S1] Yu, Y.; Guo, H.; Pujari-Palmer, M.; Stevansson, B.; Grins, J.; Engqvist, H.; Edén, M. Advanced Solid-State <sup>1</sup>H/<sup>31</sup>P NMR Characterization of Pyrophosphate-Doped Calcium Phosphate Cements for Biomedical Applications: The Structural Role of Pyrophosphate. *Ceram. Int.* **2019**, *45*, 20642–20655.
- [S2] Guo, H.; Pujari-Palmer, M.; Yu, Y.; Stevansson, B.; Engqvist, H.; Edén, M. Quantitative Phase Analyses of Pyrophosphate-Bearing Monetite and Brushite Biocements by Solid-State NMR and Powder XRD. *Ceram. Int.* **2019**, submitted.
